# Supplementary material for: Women’s autonomy and men's involvement in child care and feeding as predictors of infant and young child anthropometric indices in coffee farming households of Jimma Zone, South West of Ethiopia
Source: PLoS One. 2017 Mar 6;12(3):e0172885. doi: 10.1371/journal.pone.0172885 (PMC5338789; doi:10.1371/journal.pone.0172885)
Supplement: S1 Table — (XLSX) [file pone.0172885.s002.xlsx]

## Sheet: Anthro_standard
Nutritional survey standard analysis
Detailed tables with 95% confidence intervals*
Set 1: Sexes combined
Age groups	N	Weight-for-length/height (%)
		% < -3SD	(95% CI)	% < -2SD	(95% CI)	% > +1SD	(95% CI)	% > +2SD	(95% CI)	% > +3SD	(95% CI)	Mean	SD
Total:	731	3.1	(1.8%, 4.5%)	8.8	(6.6%, 10.9%)	17.6	(14.8%, 20.5%)	3.7	(2.3%, 5.1%)	1.1	(0.3%, 1.9%)	-0.13	1.34
(0-5)	193	4.1	(1.1%, 7.2%)	10.4	(5.8%, 14.9%)	21.8	(15.7%, 27.8%)	5.7	(2.2%, 9.2%)	1.6	(0%, 3.6%)	-0.08	1.48
(6-11)	175	3.4	(0.4%, 6.4%)	9.1	(4.6%, 13.7%)	17.1	(11.3%, 23%)	3.4	(0.4%, 6.4%)	1.1	(0%, 3%)	-0.25	1.37
(12-23)	363	2.5	(0.7%, 4.2%)	7.7	(4.8%, 10.6%)	15.7	(11.8%, 19.6%)	2.8	(0.9%, 4.6%)	0.8	(0%, 1.9%)	-0.11	1.25
(24-35)	0
(36-47)	0
(48-60)	0
Age groups	N	Length/height-for-age (%)
		% < -3SD	(95% CI)	% < -2SD	(95% CI)	Mean	SD
Total:	731	7.1	(5.2%, 9%)	19.7	(16.7%, 22.7%)	-0.73	1.43
(0-5)	193	5.2	(1.8%, 8.6%)	16.1	(10.6%, 21.5%)	-0.36	1.45
(6-11)	175	4.6	(1.2%, 8%)	11.4	(6.4%, 16.4%)	-0.35	1.37
(12-23)	363	9.4	(6.2%, 12.5%)	25.6	(21%, 30.2%)	-1.12	1.34
(24-35)	0
(36-47)	0
(48-60)	0
Age groups	N	Weight-for-age (%)
		% < -3SD	(95% CI)	% < -2SD	(95% CI)	Mean	SD
Total:	731	4.1	(2.6%, 5.6%)	12.3	(9.9%, 14.8%)	-0.52	1.26
(0-5)	193	4.1	(1.1%, 7.2%)	10.9	(6.2%, 15.5%)	-0.4	1.44
(6-11)	175	5.1	(1.6%, 8.7%)	10.9	(6%, 15.8%)	-0.42	1.27
(12-23)	363	3.6	(1.5%, 5.6%)	13.8	(10.1%, 17.5%)	-0.62	1.14
(24-35)	0
(36-47)	0
(48-60)	0
Age groups	N	BMI-for-age (%)
		% < -3SD	(95% CI)	% < -2SD	(95% CI)	% > +1SD	(95% CI)	% > +2SD	(95% CI)	% > +3SD	(95% CI)	Mean	SD
Total:	731	3	(1.7%, 4.3%)	9.7	(7.5%, 11.9%)	20.9	(17.9%, 23.9%)	4.1	(2.6%, 5.6%)	1.1	(0.3%, 1.9%)	-0.1	1.39
(0-5)	193	4.7	(1.4%, 7.9%)	11.9	(7.1%, 16.7%)	16.1	(10.6%, 21.5%)	3.6	(0.7%, 6.5%)	1.6	(0%, 3.6%)	-0.29	1.46
(6-11)	175	3.4	(0.4%, 6.4%)	11.4	(6.4%, 16.4%)	17.1	(11.3%, 23%)	3.4	(0.4%, 6.4%)	0.6	(0%, 2%)	-0.3	1.4
(12-23)	363	1.9	(0.4%, 3.5%)	7.7	(4.8%, 10.6%)	25.3	(20.7%, 30%)	4.7	(2.4%, 7%)	1.1	(0%, 2.3%)	0.09	1.32
(24-35)	0
(36-47)	0
(48-60)	0
Age groups	N	Head circumference-for-age (%)
		% < -3SD	(95% CI)	% < -2SD	(95% CI)	% > +1SD	(95% CI)	% > +2SD	(95% CI)	% > +3SD	(95% CI)	Mean	SD
Total:	0
(0-5)	0
(6-11)	0
(12-23)	0
(24-35)	0
(36-47)	0
(48-60)	0
Age groups	N	Mid-upper arm circumference-for-age** (%)
		% < -3SD	(95% CI)	% < -2SD	(95% CI)	% > +1SD	(95% CI)	% > +2SD	(95% CI)	% > +3SD	(95% CI)	Mean	SD
Total:	0
(0-5)	0
(6-11)	0
(12-23)	0
(24-35)	0
(36-47)	0
(48-60)	0
Age groups	N	Triceps skinfold-for-age** (%)
		% < -3SD	(95% CI)	% < -2SD	(95% CI)	% > +1SD	(95% CI)	% > +2SD	(95% CI)	% > +3SD	(95% CI)	Mean	SD
Total:	0
(0-5)	0
(6-11)	0
(12-23)	0
(24-35)	0
(36-47)	0
(48-60)	0
Age groups	N	Subscapular skinfold-for-age** (%)
		% < -3SD	(95% CI)	% < -2SD	(95% CI)	% > +1SD	(95% CI)	% > +2SD	(95% CI)	% > +3SD	(95% CI)	Mean	SD
Total:	0
(0-5)	0
(6-11)	0
(12-23)	0
(24-35)	0
(36-47)	0
(48-60)	0
Set 2: Males
Age groups	N	Weight-for-length/height (%)
		% < -3SD	(95% CI)	% < -2SD	(95% CI)	% > +1SD	(95% CI)	% > +2SD	(95% CI)	% > +3SD	(95% CI)	Mean	SD
Total:	398	4.3	(2.2%, 6.4%)	11.1	(7.8%, 14.3%)	17.6	(13.7%, 21.5%)	3.5	(1.6%, 5.5%)	1.3	(0%, 2.5%)	-0.26	1.45
(0-5)	115	5.2	(0.7%, 9.7%)	12.2	(5.8%, 18.6%)	23.5	(15.3%, 31.7%)	6.1	(1.3%, 10.9%)	1.7	(0%, 4.6%)	-0.12	1.62
(6-11)	89	5.6	(0.3%, 11%)	13.5	(5.8%, 21.1%)	15.7	(7.6%, 23.9%)	3.4	(0%, 7.7%)	1.1	(0%, 3.9%)	-0.47	1.51
(12-23)	194	3.1	(0.4%, 5.8%)	9.3	(4.9%, 13.6%)	14.9	(9.7%, 20.2%)	2.1	(0%, 4.3%)	1	(0%, 2.7%)	-0.25	1.32
(24-35)	0
(36-47)	0
(48-60)	0
Age groups	N	Length/height-for-age (%)
		% < -3SD	(95% CI)	% < -2SD	(95% CI)	Mean	SD
Total:	398	8.3	(5.5%, 11.1%)	22.1	(17.9%, 26.3%)	-0.88	1.44
(0-5)	115	7	(1.9%, 12%)	23.5	(15.3%, 31.7%)	-0.71	1.49
(6-11)	89	7.9	(1.7%, 14%)	12.4	(5%, 19.8%)	-0.43	1.51
(12-23)	194	9.3	(4.9%, 13.6%)	25.8	(19.4%, 32.2%)	-1.19	1.3
(24-35)	0
(36-47)	0
(48-60)	0
Age groups	N	Weight-for-age (%)
		% < -3SD	(95% CI)	% < -2SD	(95% CI)	Mean	SD
Total:	398	6	(3.6%, 8.5%)	17.1	(13.3%, 20.9%)	-0.71	1.35
(0-5)	115	7	(1.9%, 12%)	16.5	(9.3%, 23.7%)	-0.7	1.54
(6-11)	89	10.1	(3.3%, 16.9%)	16.9	(8.5%, 25.2%)	-0.63	1.45
(12-23)	194	3.6	(0.7%, 6.5%)	17.5	(11.9%, 23.1%)	-0.76	1.18
(24-35)	0
(36-47)	0
(48-60)	0
Age groups	N	BMI-for-age (%)
		% < -3SD	(95% CI)	% < -2SD	(95% CI)	% > +1SD	(95% CI)	% > +2SD	(95% CI)	% > +3SD	(95% CI)	Mean	SD
Total:	398	4.5	(2.4%, 6.7%)	12.6	(9.2%, 15.9%)	19.6	(15.6%, 23.6%)	4	(2%, 6.1%)	1.3	(0%, 2.5%)	-0.26	1.49
(0-5)	115	7	(1.9%, 12%)	14.8	(7.9%, 21.7%)	16.5	(9.3%, 23.7%)	2.6	(0%, 6%)	1.7	(0%, 4.6%)	-0.43	1.6
(6-11)	89	5.6	(0.3%, 11%)	16.9	(8.5%, 25.2%)	14.6	(6.7%, 22.5%)	3.4	(0%, 7.7%)	0	(0%, 0.6%)	-0.52	1.52
(12-23)	194	2.6	(0.1%, 5.1%)	9.3	(4.9%, 13.6%)	23.7	(17.5%, 30%)	5.2	(1.8%, 8.5%)	1.5	(0%, 3.5%)	-0.05	1.39
(24-35)	0
(36-47)	0
(48-60)	0
Age groups	N	Head circumference-for-age (%)
		% < -3SD	(95% CI)	% < -2SD	(95% CI)	% > +1SD	(95% CI)	% > +2SD	(95% CI)	% > +3SD	(95% CI)	Mean	SD
Total:	0
(0-5)	0
(6-11)	0
(12-23)	0
(24-35)	0
(36-47)	0
(48-60)	0
Age groups	N	Mid-upper arm circumference-for-age** (%)
		% < -3SD	(95% CI)	% < -2SD	(95% CI)	% > +1SD	(95% CI)	% > +2SD	(95% CI)	% > +3SD	(95% CI)	Mean	SD
Total:	0
(0-5)	0
(6-11)	0
(12-23)	0
(24-35)	0
(36-47)	0
(48-60)	0
Age groups	N	Triceps skinfold-for-age** (%)
		% < -3SD	(95% CI)	% < -2SD	(95% CI)	% > +1SD	(95% CI)	% > +2SD	(95% CI)	% > +3SD	(95% CI)	Mean	SD
Total:	0
(0-5)	0
(6-11)	0
(12-23)	0
(24-35)	0
(36-47)	0
(48-60)	0
Age groups	N	Subscapular skinfold-for-age** (%)
		% < -3SD	(95% CI)	% < -2SD	(95% CI)	% > +1SD	(95% CI)	% > +2SD	(95% CI)	% > +3SD	(95% CI)	Mean	SD
Total:	0
(0-5)	0
(6-11)	0
(12-23)	0
(24-35)	0
(36-47)	0
(48-60)	0
Set 3: Females
Age groups	N	Weight-for-length/height (%)
		% < -3SD	(95% CI)	% < -2SD	(95% CI)	% > +1SD	(95% CI)	% > +2SD	(95% CI)	% > +3SD	(95% CI)	Mean	SD
Total:	333	1.8	(0.2%, 3.4%)	6	(3.3%, 8.7%)	17.7	(13.5%, 22%)	3.9	(1.7%, 6.1%)	0.9	(0%, 2.1%)	0.02	1.18
(0-5)	78	2.6	(0%, 6.7%)	7.7	(1.1%, 14.2%)	19.2	(9.8%, 28.6%)	5.1	(0%, 10.7%)	1.3	(0%, 4.4%)	-0.02	1.26
(6-11)	86	1.2	(0%, 4%)	4.7	(0%, 9.7%)	18.6	(9.8%, 27.4%)	3.5	(0%, 7.9%)	1.2	(0%, 4%)	-0.01	1.18
(12-23)	169	1.8	(0%, 4.1%)	5.9	(2.1%, 9.8%)	16.6	(10.7%, 22.5%)	3.6	(0.5%, 6.6%)	0.6	(0%, 2%)	0.05	1.15
(24-35)	0
(36-47)	0
(48-60)	0
Age groups	N	Length/height-for-age (%)
		% < -3SD	(95% CI)	% < -2SD	(95% CI)	Mean	SD
Total:	333	5.7	(3.1%, 8.3%)	16.8	(12.6%, 21%)	-0.56	1.4
(0-5)	78	2.6	(0%, 6.7%)	5.1	(0%, 10.7%)	0.17	1.21
(6-11)	86	1.2	(0%, 4%)	10.5	(3.4%, 17.5%)	-0.27	1.2
(12-23)	169	9.5	(4.8%, 14.2%)	25.4	(18.6%, 32.3%)	-1.05	1.39
(24-35)	0
(36-47)	0
(48-60)	0
Age groups	N	Weight-for-age (%)
		% < -3SD	(95% CI)	% < -2SD	(95% CI)	Mean	SD
Total:	333	1.8	(0.2%, 3.4%)	6.6	(3.8%, 9.4%)	-0.28	1.1
(0-5)	78	0	(0%, 0.6%)	2.6	(0%, 6.7%)	0.03	1.15
(6-11)	86	0	(0%, 0.6%)	4.7	(0%, 9.7%)	-0.21	1.02
(12-23)	169	3.6	(0.5%, 6.6%)	9.5	(4.8%, 14.2%)	-0.47	1.08
(24-35)	0
(36-47)	0
(48-60)	0
Age groups	N	BMI-for-age (%)
		% < -3SD	(95% CI)	% < -2SD	(95% CI)	% > +1SD	(95% CI)	% > +2SD	(95% CI)	% > +3SD	(95% CI)	Mean	SD
Total:	333	1.2	(0%, 2.5%)	6.3	(3.5%, 9.1%)	22.5	(17.9%, 27.2%)	4.2	(1.9%, 6.5%)	0.9	(0%, 2.1%)	0.09	1.23
(0-5)	78	1.3	(0%, 4.4%)	7.7	(1.1%, 14.2%)	15.4	(6.7%, 24%)	5.1	(0%, 10.7%)	1.3	(0%, 4.4%)	-0.08	1.22
(6-11)	86	1.2	(0%, 4%)	5.8	(0.3%, 11.3%)	19.8	(10.8%, 28.8%)	3.5	(0%, 7.9%)	1.2	(0%, 4%)	-0.07	1.22
(12-23)	169	1.2	(0%, 3.1%)	5.9	(2.1%, 9.8%)	27.2	(20.2%, 34.2%)	4.1	(0.8%, 7.4%)	0.6	(0%, 2%)	0.24	1.22
(24-35)	0
(36-47)	0
(48-60)	0
Age groups	N	Head circumference-for-age (%)
		% < -3SD	(95% CI)	% < -2SD	(95% CI)	% > +1SD	(95% CI)	% > +2SD	(95% CI)	% > +3SD	(95% CI)	Mean	SD
Total:	0
(0-5)	0
(6-11)	0
(12-23)	0
(24-35)	0
(36-47)	0
(48-60)	0
Age groups	N	Mid-upper arm circumference-for-age** (%)
		% < -3SD	(95% CI)	% < -2SD	(95% CI)	% > +1SD	(95% CI)	% > +2SD	(95% CI)	% > +3SD	(95% CI)	Mean	SD
Total:	0
(0-5)	0
(6-11)	0
(12-23)	0
(24-35)	0
(36-47)	0
(48-60)	0
Age groups	N	Triceps skinfold-for-age** (%)
		% < -3SD	(95% CI)	% < -2SD	(95% CI)	% > +1SD	(95% CI)	% > +2SD	(95% CI)	% > +3SD	(95% CI)	Mean	SD
Total:	0
(0-5)	0
(6-11)	0
(12-23)	0
(24-35)	0
(36-47)	0
(48-60)	0
Age groups	N	Subscapular skinfold-for-age** (%)
		% < -3SD	(95% CI)	% < -2SD	(95% CI)	% > +1SD	(95% CI)	% > +2SD	(95% CI)	% > +3SD	(95% CI)	Mean	SD
Total:	0
(0-5)	0
(6-11)	0
(12-23)	0
(24-35)	0
(36-47)	0
(48-60)	0
Set 4: Overall, sexes combined by cluster
Cluster	N	Weight-for-length/height (%)
		% < -3SD	(95% CI)	% < -2SD	(95% CI)	% > +1SD	(95% CI)	% > +2SD	(95% CI)	% > +3SD	(95% CI)	Mean	SD
Cluster	N	Length/height-for-age (%)
		% < -3SD	(95% CI)	% < -2SD	(95% CI)	Mean	SD
Cluster	N	Weight-for-age (%)
		% < -3SD	(95% CI)	% < -2SD	(95% CI)	Mean	SD
Cluster	N	BMI-for-age (%)
		% < -3SD	(95% CI)	% < -2SD	(95% CI)	% > +1SD	(95% CI)	% > +2SD	(95% CI)	% > +3SD	(95% CI)	Mean	SD
Cluster	N	Head circumference-for-age (%)
		% < -3SD	(95% CI)	% < -2SD	(95% CI)	% > +1SD	(95% CI)	% > +2SD	(95% CI)	% > +3SD	(95% CI)	Mean	SD
Cluster	N	Mid-upper arm circumference-for-age (%)
		% < -3SD	(95% CI)	% < -2SD	(95% CI)	% > +1SD	(95% CI)	% > +2SD	(95% CI)	% > +3SD	(95% CI)	Mean	SD
Cluster	N	Triceps skinfold-for-age (%)
		% < -3SD	(95% CI)	% < -2SD	(95% CI)	% > +1SD	(95% CI)	% > +2SD	(95% CI)	% > +3SD	(95% CI)	Mean	SD
Cluster	N	Subscapular skinfold-for-age (%)
		% < -3SD	(95% CI)	% < -2SD	(95% CI)	% > +1SD	(95% CI)	% > +2SD	(95% CI)	% > +3SD	(95% CI)	Mean	SD
*) Values are based on WHO standards.
For each indicator all children are included in the evaluation with a plausible z-score (defined under Survey options).
Percentages below median based on weight-dependent indicators are defined as <-3 SD or oedema, and <-2 SD or oedema. Oedema cases are not used to derive mean and SD of z-scores.
%<-2SD includes %<-3SD; %>+2SD includes %>+3SD; %>+1SD includes %>+2SD and %>+3SD.
Number of children with oedema: 0 (this number may be used to calculate the prevalence of oedematous malnutrition in a sample)
**) 3 months is the lowest age for this indicator.
